# Supplementary material for: Spirituality is associated with immune parameters and disease activity in primary Sjögren’s syndrome: a cross-sectional study
Source: PubMed Central journal article supplement (PMC11139944; doi:10.1038/s41598-024-62801-w), 2024-05-30
Supplement: 41598_2024_62801_MOESM1_ESM.pdf [file 41598_2024_62801_MOESM1_ESM.pdf]

## Supplementary information

|                                            |                                           | Not or little religious<br>(n = 55) | Religious or very<br>religious<br>(n = 53) | p-value  |
|--------------------------------------------|-------------------------------------------|-------------------------------------|--------------------------------------------|----------|
|                                            |                                           | Average (95%CI)                     |                                            |          |
| Age (year)                                 |                                           | 59.45 (56.34 – 62.57)               | 59.64 (56.05 – 63.23)                      | 0.770    |
| Disease duration                           |                                           | 16.61 (13.85 – 19.37)               | 14.06 (11.97 – 16.15)                      | 0.390    |
| Duration of prayer/meditation (hours/week) |                                           | 0.31 (0.00 – 0.69)                  | 1.30 (0.72 – 1.89)                         | <0.001** |
|                                            |                                           | Prevalence in % (95% CI)            |                                            | p-value  |
| Female                                     |                                           | 85.45 (74.42 – 92.88)               | 94.34 (85.66 – 98.38)                      | 0.127    |
| Settlement type                            | Capital or city                           | 47.27 (34.50 – 60.32)               | 28.30 (17.56 – 41.34)                      | 0.052    |
|                                            | Small town                                | 36.36 (24.61 – 49.51)               | 37.74 (25.62 – 51.15)                      |          |
|                                            | Rural                                     | 16.36 (8.42 – 27.74)                | 33.96 (22.33 – 47.29)                      |          |
| Education                                  | Not completed or completed primary school | 10.91 (4.68 – 21.11)                | 5.66 (1.62 – 14.34)                        | 0.590    |
|                                            | High school                               | 50.91 (37.94 – 63.79)               | 56.60 (43.21 – 69.30)                      |          |
|                                            | College/university diploma                | 38.18 (26.21 – 51.36)               | 37.74 (25.62 – 51.15)                      |          |
| Living in partnership                      |                                           | 61.82 (48.64 – 73.79)               | 67.92 (54.67 – 79.28)                      | 0.506    |
| Smokers                                    |                                           | 7.27 (2.50 – 16.37)                 | 3.77 (0.79 – 11.56)                        | 0.427    |
| Engaged in individual spiritual activity   |                                           | 12.73 (5.88 – 23.37)                | 56.60 (43.21 – 69.30)                      | <0.001** |
| Self-assessed level of spirituality        | Non-spiritual                             | 63.64 (50.49 – 75.39)               | 24.53 (14.50 – 37.25)                      | <0.001** |
|                                            | Little spiritual                          | 25.45 (15.40 – 38.01)               | 18.87 (10.14 – 30.89)                      |          |
|                                            | Very spiritual or spiritual               | 10.91 (4.68 – 21.11)                | 56.60 (43.21 – 69.30)                      |          |

\*: p <0.05; \*\*: p<0.01

Supplementary table 1. Comparison of sociodemographic characteristics and self-assessed measures of spirituality and religiousness of the research sample between not or little religious and religious or very religious groups. CI: confidence interval. Confidence interval level of 95% was applied.

|      | Non-spiritual (n = 48)   | Spiritual (n = 60)       | p-value |
|------|--------------------------|--------------------------|---------|
|      | Average (95%CI)          |                          |         |
| NEU  | 4.05 (3.59 – 4.51)       | 3.77 (3.35 – 4.19)       | 0.264   |
| LY   | 1.44 (1.26 – 1.62)       | 1.61 (1.44 – 1.78)       | 0.124   |
| HGB  | 133.96 (130.69 – 137.23) | 137.87 (134.54 – 141.19) | 0.201   |
| PLT  | 227.30 (211.65 – 242.95) | 232.12 (219.24 – 244.99) | 0.629   |
| C3   | 1.28 (1.21 - 1.35)       | 1.26 (1.19 - 1.33)       | 0.829   |
| C4   | 0.23 (0.21 - 0.25)       | 0.25 (0.20 - 0.30)       | 0.792   |
| CH50 | 69.50 (61.79 - 77.21)    | 71.90 (65.78 - 78.02)    | 0.555   |

Supplementary table 2. Comparison of blood cell counts and complement activities between non-spiritual and spiritual groups. NEU: neutrophil granulocyte count, LY: lymphocyte count, HGB: hemoglobin concentration, PLT: platelet count, C3, C4, CH50: complement component C3, C4 and total complement activity respectively, CI: confidence interval. Confidence interval level of 95% was applied.

|                                | Not or little religious<br>(n = 55) | Religious or very religious<br>(n = 53) | p-value |
|--------------------------------|-------------------------------------|-----------------------------------------|---------|
|                                | Average (95%CI)                     |                                         |         |
| NEU                            | 3.93 (3.52 - 4.34)                  | 3.85 (3.39 - 4.32)                      | 0.625   |
| LY                             | 1.39 (1.25 - 1.54)                  | 1.69 (1.49 - 1.88)                      | 0.019*  |
| HGB                            | 137.36 (134 - 140.53)               | 134.87 (131.31 - 138.42)                | 0.159   |
| PLT                            | 224.53 (210.76 - 238.30)            | 235.79 (221.50 - 250.08)                | 0.198   |
| C3                             | 1.26 (1.20 - 1.31)                  | 1.28 (1.20 - 1.36)                      | 0.591   |
| C4                             | 0.22 (0.20 - 0.24)                  | 0.26 (0.21 - 0.32)                      | 0.293   |
| CH50                           | 69.31 (62.97 - 75.65)               | 72.42 (65.12 - 79.71)                   | 0.561   |
| IGG                            | 13.06 (11.67 - 14.44)               | 16.04 (13.33 - 18.75)                   | 0.136   |
| RF                             | 32.24 (16.99 - 47.48)               | 46.34 (13.71 - 78.97)                   | 0.404   |
| SSA                            | 41.62 (32.33 - 50.90)               | 47.34 (37.34 - 57.34)                   | 0.278   |
| SSB                            | 26.60 (18.54 - 34.66)               | 36.06 (26.06 - 46.05)                   | 0.110   |
| ESSDAI                         | 4.80 (4.10 - 5.49)                  | 4.80 (4.10 - 5.49)                      | 0.404   |
| ESSPRI score                   | 4.80 (4.10 - 5.49)                  | 4.80 (4.10 - 5.49)                      | 0.156   |
| <i>ESSPRI main items (1-3)</i> |                                     |                                         |         |
| dryness (ESSPRI01)             | 5.89 (5.33 - 6.45)                  | 4.81 (4.13 - 5.49)                      | 0.035*  |
| fatigue (ESSPRI02)             | 5.69 (4.99 - 6.39)                  | 4.81 (3.99 - 5.62)                      | 0.102   |
| limb pain (ESSPRI03)           | 4.95 (4.08 - 5.81)                  | 5.02 (4.16 - 5.87)                      | 0.992   |
| <i>ESSPRI items 4-10</i>       |                                     |                                         |         |
| mental fatigue (ESSPRI04)      | 2.98 (2.35 - 3.62)                  | 2.92 (2.19 - 3.65)                      | 0.803   |
| <i>ESSPRI dryness items</i>    |                                     |                                         |         |
| ocular (ESSPRI05)              | 5.67 (5.03 - 6.31)                  | 4.57 (3.83 - 5.31)                      | 0.026   |
| oral (ESSPRI06)                | 5.55 (4.76 - 6.34)                  | 4.94 (4.21 - 5.68)                      | 0.214   |
| skin (ESSPRI07)                | 5.27 (4.60 - 5.95)                  | 4.33 (3.57 - 5.10)                      | 0.062   |
| nasal (ESSPRI08)               | 3.83 (3.02 - 4.65)                  | 3.35 (2.58 - 4.12)                      | 0.400   |
| tracheal (ESSPRI09)            | 4.00 (3.25 - 4.75)                  | 3.71 (2.82 - 4.59)                      | 0.577   |
| vaginal (ESSPRI10)             | 2.92 (1.99 - 3.85)                  | 2.57 (1.80 - 3.34)                      | 0.926   |

\*: p <0.05; \*\*: p<0.01

Supplementary table 3. Comparison of blood cell counts, immune parameters and disease activity markers between not or little religious and religious or very religious groups. NEU: neutrophil granulocyte count, LY: lymphocyte count, HGB: hemoglobin concentration, PLT: platelet count, C3, C4, CH50: complement component C3, C4 and total complement activity respectively, IGG: Immunoglobulin G, RF: rheumatoid factor, SSA: anti-Ro/SSA autoantibody, SSB: anti-La/SSB autoantibody, ESSDAI: EULAR Sjögren's Syndrome Disease Activity Index, ESSPRI: EULAR Sjögren's Syndrome Patient Reported Index, CI: confidence interval. Confidence interval level of 95% was applied.

| Religiousness                  |                     |         |
|--------------------------------|---------------------|---------|
|                                | B-value (Std. err.) | p-value |
| IGG                            | 3.732 (1.839)       | 0.045*  |
| RF                             | 25.717 (17.926)     | 0.155   |
| SSA                            | 15.731 (6.996)      | 0.027*  |
| SSB                            | 14.744 (5.773)      | 0.012*  |
| ESSDAI                         | 0.246 (0.752)       | 0.744   |
| ESSPRI score                   | -3.62 (0.525)       | 0.492   |
| <i>ESSPRI main items (1-3)</i> |                     |         |
| dryness (ESSPRI01)             | -0.785 (0.533)      | 0.144   |
| fatigue (ESSPRI02)             | -0.267 (0.635)      | 0.675   |
| limb pain (ESSPRI03)           | 0.002 (0.661)       | 0.997   |
| <i>ESSPRI items 4-10</i>       |                     |         |
| mental fatigue (ESSPRI04)      | -0.790 (0.546)      | 0.151   |
| <i>ESSPRI dryness items</i>    |                     |         |
| ocular (ESSPRI05)              | -0.662 (0.594)      | 0.268   |
| oral (ESSPRI06)                | -0.598 (0.659)      | 0.366   |
| skin (ESSPRI07)                | -0.034 (0.576)      | 0.953   |
| nasal (ESSPRI08)               | -0.329 (0.659)      | 0.619   |
| tracheal (ESSPRI09)            | 0.448 (0.639)       | 0.485   |
| vaginal (ESSPRI10)             | 0.075 (0.665)       | 0.911   |

\*: p < 0.05; \*\*: p < 0.01

Supplementary table 4. Linear regression of religiousness adjusted for sex, age, disease duration, type of the settlement, education, living in partnership, smoking, spirituality, engagement in prayer/meditation. IGG: Immunoglobulin G, RF: rheumatoid factor, SSA: anti-Ro/SSA autoantibody, SSB: anti-La/SSB autoantibody, ESSDAI: EULAR Sjögren's Syndrome Disease Activity Index, ESSPRI: EULAR Sjögren's Syndrome Patient Reported Index. Standard error ranges for B values in parentheses.

|                             | Prayer/Meditation<br>Enjoyment |         | Universal Connectedness |         | Greater Purpose        |         | Wholeness of Humanity  |         | Closeness to the<br>Deceased |         |
|-----------------------------|--------------------------------|---------|-------------------------|---------|------------------------|---------|------------------------|---------|------------------------------|---------|
|                             | B-value<br>(Std. err.)         | p-value | B-value<br>(Std. err.)  | p-value | B-value<br>(Std. err.) | p-value | B-value<br>(Std. err.) | p-value | B-value<br>(Std. err.)       | p-value |
| NEU                         | 0.016 (0.031)                  | 0.602   | -0.015 (0.040)          | 0.717   | 0.054 (0.068)          | 0.426   | 0.046 (0.046)          | 0.317   | -0.029 (0.078)               | 0.708   |
| LY                          | 0.018 (0.012)                  | 0.154   | 0.000 (0.016)           | 0.982   | -0.023 (0.027)         | 0.400   | -0.029 (0.018)         | 0.112   | 0.037 (0.031)                | 0.241   |
| HGB                         | 0.157 (0.224)                  | 0.487   | 0.654 (0.294)           | 0.231   | -0.366 (0.492)         | 0.459   | -0.095 (0.336)         | 0.778   | 0.825 (0.558)                | 0.143   |
| PLT                         | 0.799 (0.973)                  | 0.414   | 2.209 (1.269)           | 0.085   | 1.227 (2.153)          | 0.570   | 1.856 (1.451)          | 0.204   | 2.460 (2.447)                | 0.317   |
| C3                          | -0.002 (0.005)                 | 0.655   | -0.020 (0.007)          | 0.003** | -0.026 (0.011)         | 0.026*  | -0.005 (0.008)         | 0.562   | -0.022 (0.013)               | 0.088   |
| C4                          | 0.003 (0.003)                  | 0.212   | -0.005 (0.004)          | 0.198   | -0.003 (0.006)         | 0.587   | 0.003 (0.004)          | 0.416   | -0.008 (0.007)               | 0.240   |
| CH50                        | 0.106 (0.499)                  | 0.833   | -0.038 (0.668)          | 0.954   | -0.176 (1.098)         | 0.873   | -0.546 (0.750)         | 0.469   | -0.469 (1.250)               | 0.708   |
| IGG                         | -0.233 (0.151)                 | 0.126   | 0.010 (0.203)           | 0.963   | 0.559 (0.331)          | 0.095   | 0.241 (0.229)          | 0.296   | -0.364 (0.384)               | 0.345   |
| RF                          | -0.987 (1.502)                 | 0.517   | -1.023 (1.982)          | 0.607   | 1.354 (3.280)          | 0.681   | 1.523 (2.255)          | 0.501   | -1.374 (3.733)               | 0.714   |
| SSA                         | -0.812 (0.576)                 | 0.162   | -0.382 (0.777)          | 0.624   | 0.687 (1.280)          | 0.593   | 0.385 (0.881)          | 0.663   | -0.346 (1.464)               | 0.814   |
| SSB                         | -0.148 (0.480)                 | 0.759   | 0.002 (0.624)           | 0.997   | 1.481 (1.047)          | 0.160   | 0.769 (0.723)          | 0.290   | -0.811 (1.205)               | 0.503   |
| ESSDAI                      | -0.055 (0.064)                 | 0.389   | -0.042 (0.085)          | 0.622   | 0.027 (0.140)          | 0.846   | 0.137 (0.097)          | 0.159   | -0.151 (0.156)               | 0.336   |
| ESSPRI score                | -0.34 (0.043)                  | 0.442   | -0.022 (0.060)          | 0.714   | -0.105 (0.096)         | 0.277   | -0.051 (0.066)         | 0.439   | 0.150 (0.110)                | 0.343   |
| <i>ESSPRI main items</i>    |                                |         |                         |         |                        |         |                        |         |                              |         |
| dryness (ESSPRI01)          | 0.000 (0.015)                  | 0.999   | -0.013 (0.059)          | 0.827   | -0.090 (0.097)         | 0.359   | -0.010 (0.068)         | 0.886   | 0.053 (0.113)                | 0.640   |
| fatigue (ESSPRI02)          | 0.037 (0.053)                  | 0.491   | 0.044 (0.071)           | 0.536   | 0.028 (0.116)          | 0.813   | 0.053 (0.080)          | 0.509   | 0.197 (0.133)                | 0.143   |
| limb pain (ESSPRI03)        | -0.029 (0.056)                 | 0.602   | -0.023 (0.074)          | 0.750   | -0.188 (0.120)         | 0.119   | -0.118 (0.083)         | 0.156   | 0.135 (0.140)                | 0.335   |
| <i>ESSPRI items 4-10</i>    |                                |         |                         |         |                        |         |                        |         |                              |         |
| mental fatigue (ESSPRI04)   | 0.065 (0.045)                  | 0.156   | 0.073 (0.060)           | 0.231   | 0.038 (0.099)          | 0.701   | -0.020 (0.068)         | 0.773   | 0.276 (0.110)                | 0.014*  |
| <i>ESSPRI dryness items</i> |                                |         |                         |         |                        |         |                        |         |                              |         |
| ocular (ESSPRI05)           | 0.065 (0.049)                  | 0.193   | 0.056 (0.066)           | 0.399   | -0.042 (0.108)         | 0.698   | -0.006 (0.074)         | 0.939   | -0.099 (0.123)               | 0.423   |
| oral (ESSPRI06)             | -0.020 (0.055)                 | 0.719   | -0.058 (0.073)          | 0.425   | -0.149 (0.119)         | 0.213   | -0.026 (0.082)         | 0.753   | 0.115 (0.137)                | 0.402   |
| skin (ESSPRI07)             | -0.062 (0.048)                 | 0.197   | -0.022 (0.064)          | 0.729   | -0.031 (0.105)         | 0.765   | -0.081 (0.071)         | 0.255   | 0.070 (0.120)                | 0.561   |
| nasal (ESSPRI08)            | -0.029 (0.055)                 | 0.604   | -0.024 (0.073)          | 0.747   | -0.012 (0.121)         | 0.922   | -0.084 (0.081)         | 0.304   | 0.059 (0.137)                | 0.667   |

|                     |                |        |                |       |                |       |                |       |                |       |
|---------------------|----------------|--------|----------------|-------|----------------|-------|----------------|-------|----------------|-------|
| tracheal (ESSPRI09) | -0.059 (0.053) | 0.265  | -0.007 (0.071) | 0.917 | 0.017 (0.117)  | 0.885 | -0.046 (0.079) | 0.561 | 0.157 (0.131)  | 0.235 |
| vaginal (ESSPRI10)  | -0.118 (0.056) | 0.038* | -0.017 (0.078) | 0.832 | -0.056 (0.121) | 0.62  | 0.011 (0.087)  | 0.904 | -0.019 (0.134) | 0.886 |

\*: p <0.05; \*\*: p<0.01

Supplementary table 5. Linear regression adjusted for sex, age, disease duration, type of the settlement, education, living in partnership, smoking, religiousness, spirituality, engagement in prayer/meditation and one of the five subscales of the Spiritual Transcendence Scale. NEU: neutrophil granulocyte count, LY: lymphocyte count, HGB: hemoglobin concentration, PLT: platelet count, C3, C4, CH50: complement component C3, C4 and total complement activity respectively, IGG: Immunoglobulin G, RF: rheumatoid factor, SSA: anti-Ro/SSA autoantibody, SSB: anti-La/SSB autoantibody, ESSDAI: EULAR Sjögren's Syndrome Disease Activity Index, ESSPRI: EULAR Sjögren's Syndrome Patient Reported Index. Standard error ranges of B values in parentheses.

|        | Prayer/Meditation Enjoyment |         | Universal Connectedness |         | Greater Purpose       |         | Wholeness of Humanity |         | Closeness to the Deceased |         |
|--------|-----------------------------|---------|-------------------------|---------|-----------------------|---------|-----------------------|---------|---------------------------|---------|
|        | OR (95%CI)                  | p-value | OR (95%CI)              | p-value | OR (95%CI)            | p-value | OR (95%CI)            | p-value | OR (95%CI)                | p-value |
| ESSDAI | 0.950 (0.864- 1.045)        | 0.295   | 0.912 (0.807 – 1.030)   | 0.137   | 0.985 (0.807 – 1.201) | 0.878   | 1.026 (0.892 – 1.181) | 0.717   | 0.920 (0.729 – 1.160)     | 0.479   |
| ESSPRI | 0.982 (0.902 – 1.068)       | 0.667   | 1.006 (0.897 – 1.128)   | 0.921   | 0.917 (0.758 – 1.109) | 0.371   | 0.951 (0.835 – 1.082) | 0.444   | 1.187 (0.950 – 1.482)     | 0.131   |
| SSA    | 0.933 (0.848 – 1.027)       | 0.156   | 1.019 (0.906 – 1.145)   | 0.755   | 1.061 (0.873 – 1.290) | 0.552   | 1.131 (0.982 – 1.301) | 0.087   | 0.900 (0.715 – 1.134)     | 0.373   |
| SSB    | 0.951 (0.861 – 1.049)       | 0.315   | 0.990 (0.871 – 1.125)   | 0.876   | 1.117 (0.897 – 1.392) | 0.323   | 1.119 (0.957 – 1.308) | 0.157   | 0.848 (0.653 – 1.100)     | 0.848   |

\*: p <0.05; \*\*: p<0.01

Supplementary table 6. Logistic regression analysis for the five subscales of the Spiritual Transcendence Scale. ESSDAI: EULAR Sjögren's Syndrome Disease Activity Index, ESSPRI: EULAR Sjögren's Syndrome Patient Reported Index, SSA: anti-Ro/SSA autoantibody, SSB: anti-La/SSB autoantibody, OR: odds ratio, CI: confidence interval. Confidence interval level of 95% was applied.
